# Supplementary material
Source: publisher site journal article supplement (https://www.spandidos-publications.com/5453/downloadSupplementary)
Supplement: Supplementary file 1 [file downloadSupplementary]

**Table SI.** The scoring criteria of Reflux Disease Questionnaire.

| <b>Reflux severity</b>                                                                  | <b>Reflux frequency</b> | <b>Score</b> |
|-----------------------------------------------------------------------------------------|-------------------------|--------------|
| No symptom                                                                              | -                       | 0 point      |
| Mild symptoms as determined by a physician                                              | <1 day/week             | 1 point      |
| Between 1 point and 3 points                                                            | 1 day/week              | 2 points     |
| Moderate symptoms that affect daily life and requiring occasional medication            | 2-3 days/week           | 3 points     |
| Between 3 points and 5 points                                                           | 4-5 days/week           | 4 points     |
| Severe symptoms that significantly affect daily life and requiring long-term medication | 6-7 days/week           | 5 points     |

Symptoms include regurgitation, heartburn, noncardiogenic chest pain, and food reflux.
